# Supplementary material for: General electrochemical assembling to porous nanowires with high adaptability to water treatment
Source: Royal Society of Chemistry journal article supplement (doi:10.1039/c0ce00519c), 2011-01-01
Supplement: c0ce00519c.pdf [file c0ce00519c.pdf]

## General Electrochemical Assembling to Porous Nanowires with High Adaptability in Water Treatment

Xihong Lu,<sup>a</sup> Dezhou Zheng,<sup>a</sup> Ming Xu,<sup>a</sup> Shilei Xie,<sup>a</sup> Zhaoqing Liu,<sup>ac</sup> Chaolun Liang,<sup>b</sup>  
Peng Liu,<sup>\*a</sup> and Yexiang Tong<sup>\*\*a</sup>

<sup>a</sup>MOE of the Key Laboratory of Bioinorganic and Synthetic Chemistry, School of Chemistry and Chemical Engineering, Institute of Optoelectronic and Functional Composite Materials, Sun Yat-Sen University, Guangzhou 510275, China

<sup>b</sup>Instrumental Analysis and Research Centre, Sun Yat-Sen University, Guangzhou 510275, China

<sup>c</sup>School of Chemistry and Chemical Engineering, Guangzhou University, Guangzhou 510006, China

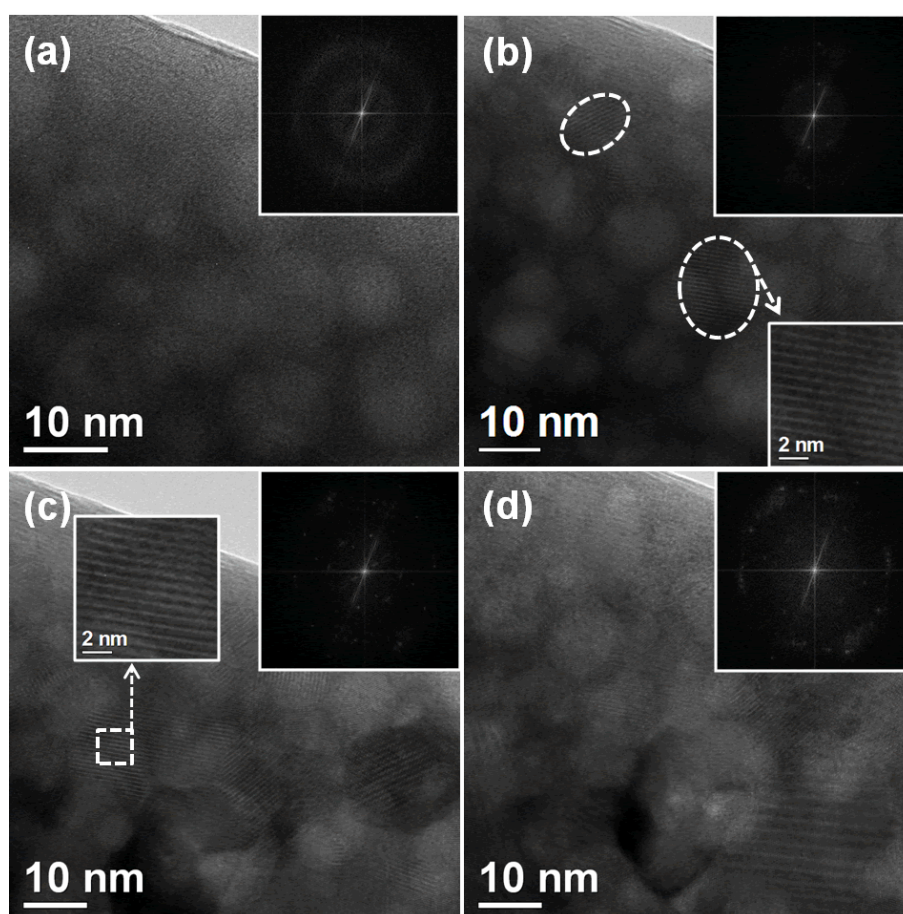

**Fig. S1** Time evolution of the HRTEM images of porous CeO<sub>2</sub> NWs under electron beam irradiation. (a) 0 min, (b) 1 min, (c) 3 min, and (d) 6 min. The porous La(OH)<sub>3</sub> NWs exhibit a crystal phase transformation under electron beam irradiation during the in-situ TEM observations. Despite the kinetic energy of the electron beam is relatively low ( $1.7 \times 10^{22}$  electrons cm<sup>-2</sup> s<sup>-1</sup> with a kinetic energy of 200 keV, JEM2010-HR), small crystalline grains were rapidly generated in parts of porous La(OH)<sub>3</sub> NWs under electron beam irradiation for 1 min, as illustrated in Fig.3b. The corresponding fast Fourier transmission (FFT) pattern (inset in Fig.3b) also demonstrates the induced crystallization. When the irradiation prolonged to 3 min, many crystalline grains are clearly observed on the whole La(OH)<sub>3</sub> NWs, as shown in Fig.3c. The corresponding FFT pattern shows a distinctly diffused diffracton ring, indicating the better crystallization. When further prolonging the irradiation time, no single but high crystalline La(OH)<sub>3</sub> NWs were obtained. This might be attributed to the kinetic energy of the electron beam, which is too low to induce the single crystalline phase transition.

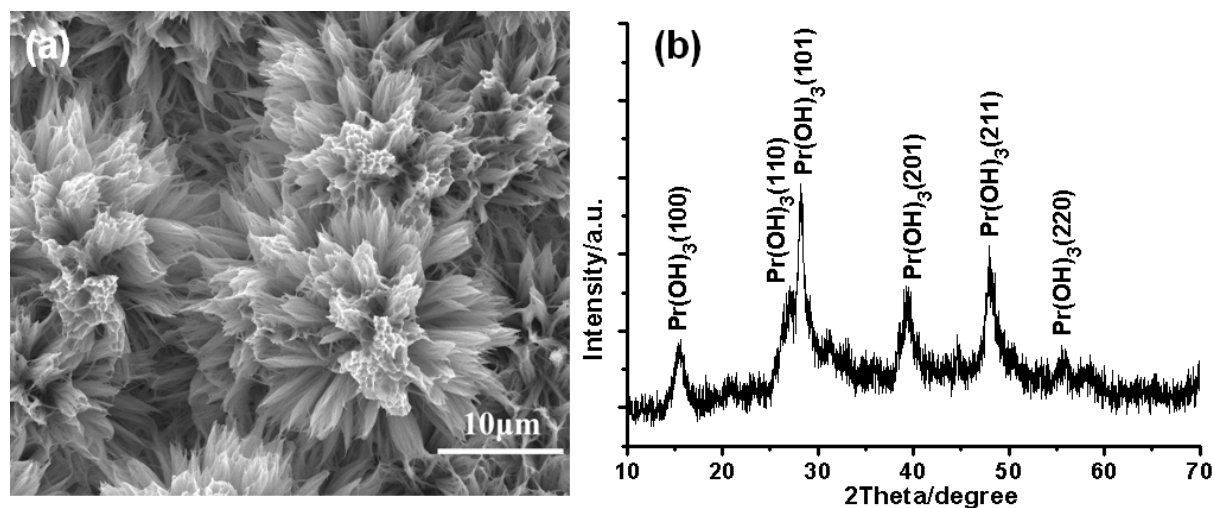

**Fig. S2** (a) SEM image and (b) XRD pattern of the Pr(OH)<sub>3</sub> NWs prepared in solution of 0.01M Pr(NO<sub>3</sub>)<sub>3</sub> + 0.02 M CH<sub>3</sub>COONH<sub>4</sub> + 0.05 M KCl with a potential of -0.7 V (vs SCE) for 60 min at 70 °C.

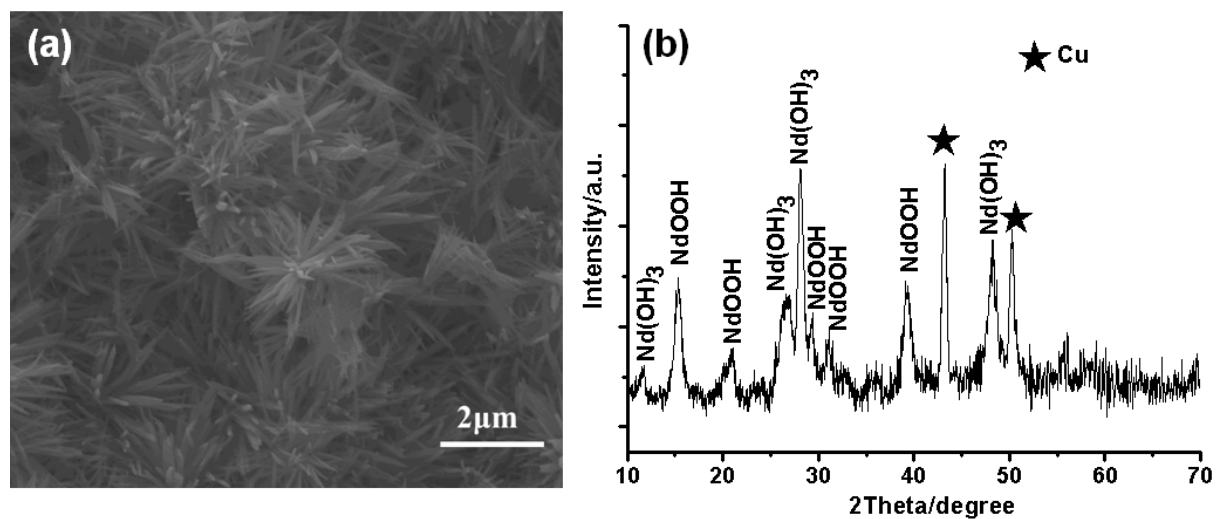

**Fig. S3** SEM image and XRD pattern of the Nd(OH)<sub>3</sub> NWs prepared in solution of 0.01M Nd(NO<sub>3</sub>)<sub>3</sub> + 0.02 M CH<sub>3</sub>COONH<sub>4</sub> + 0.05 M KCl with a potential of -0.7 V (vs SCE) for 60 min at 70 °C.

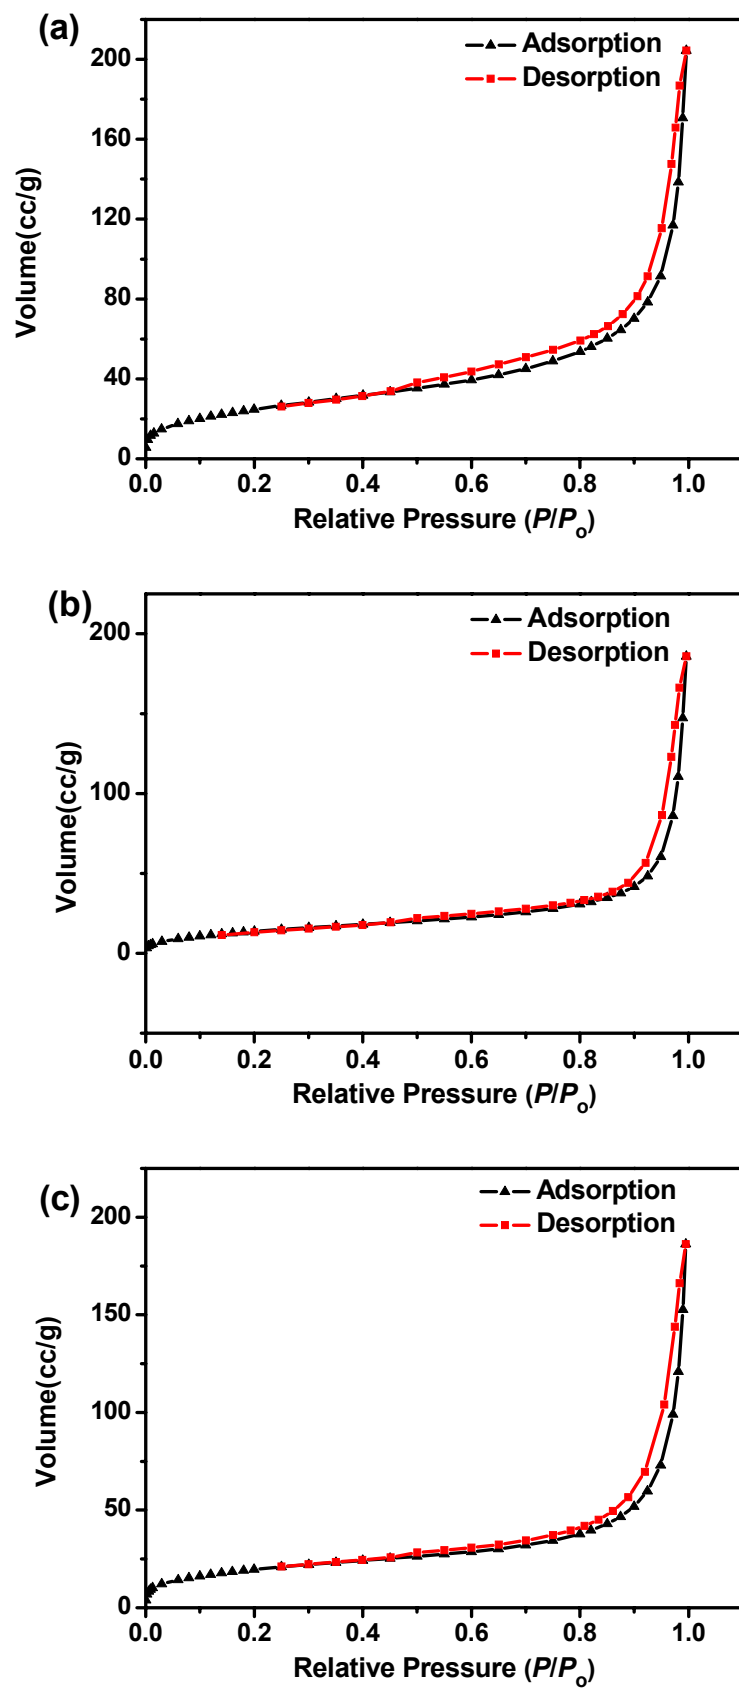

**Fig. S4** Nitrogen adsorption-desorption isotherms of porous NWs prepared at -0.7 V. (a)  $\text{La(OH)}_3$ , (b)  $\text{Pr(OH)}_3$ , and (c)  $\text{Nd(OH)}_3$ .
